# Supplementary material for: Resonant inelastic X-ray scattering
Source: Springer Nature journal article supplement (doi:10.1038/s43586-024-00322-6), 2024-07-04
Supplement: 43586_2024_322_MOESM1_ESM.pdf [file 43586_2024_322_MOESM1_ESM.pdf]

Supplementary information

---

# Resonant inelastic X-ray scattering

---

In the format provided by  
the authors and unedited

# RESONANT INELASTIC X-RAY SCATTERING

Frank M. F. de Groot<sup>1,2†</sup>, Maurits W. Haverkort<sup>3</sup>, Hebatalla Elnaggar<sup>4</sup>, Amélie Juhin<sup>4</sup>, Ke-jin Zhou<sup>1†</sup> and Pieter Glatzel<sup>5</sup>

<sup>1</sup>Diamond Light Source, Harwell Campus, Didcot, OX11 0DE, UK

<sup>2</sup>Debye Institute for Nanomaterials Science, Utrecht University, 3584 CA Utrecht, Netherlands

<sup>3</sup>Heidelberg University, Philosophenweg 19, 69120 Heidelberg, Germany

<sup>4</sup>Institute of Mineralogy, Physics of Materials and Cosmochemistry, CNRS, Sorbonne University, 4 Place Jussieu, 75005 Paris, France

<sup>5</sup>European Synchrotron Radiation Facility, 71 Avenue des Martyres, 38000 Grenoble, France.

†email: [f.m.f.degroot@uu.nl](mailto:f.m.f.degroot@uu.nl) , [kejin.zhou@diamond.ac.uk](mailto:kejin.zhou@diamond.ac.uk)

## SUPPLEMENTARY INFORMATION

### INTERACTION OF X-RAYS WITH MATTER

The scattering of light from matter can be derived from Schrödinger's equation with the use of time dependent perturbation theory. The system without external light source defines the unperturbed state. The interaction between light and the electrons of a material is treated perturbatively. In linear order this yields the elastic scattering length as given by Kubo's formula. In second order this yields, with some slight modifications, the Kramers-Heisenberg equation describing the inelastic scattering of light.

Both in classical and in quantum physics, Maxwell's equations and the interaction between external electromagnetic fields and electrons are included into the Hamiltonian of a system by replacing the momentum of the electrons  $\vec{p}$  with  $\vec{p} - e\vec{A}$ . In classical physics  $\vec{A}$  is the vector potential defining the external magnetic and electric field. The constant  $e$  is the charge of the electron. To quantize the electromagnetic field, the vector potential  $\vec{A}$  can be expanded on a basis of plane waves inside a box with volume  $V$ . This yields a set of allowed modes with wave-vector  $\vec{k}$  and polarization  $\vec{\epsilon}$ . We can write the vector potential  $\vec{A}$  as an operator that can create or annihilate photons into the different plane wave modes:

$$\vec{A} = \sum_{\vec{k}, \sigma} \sqrt{\frac{\hbar}{2\omega\epsilon_0 V}} \left( \vec{\epsilon}_{\sigma} b_{\sigma, \vec{k}} e^{i\vec{k} \cdot \vec{r}} + \vec{\epsilon}_{\sigma}^* b_{\sigma, \vec{k}}^{\dagger} e^{-i\vec{k} \cdot \vec{r}} \right)$$

with the operators  $b_{\sigma, \vec{k}}^{\dagger}$  and  $b_{\sigma, \vec{k}}$  creating or annihilating a photon in the mode with wavevector  $\vec{k}$ , energy  $\hbar\omega$  and polarization  $\vec{\epsilon}_{\sigma}$ . The quantum number  $\sigma$  defines the two orthonormal vectors that form a basis for the polarization of the light. There are only two and not three polarization basis vectors as the polarization vector has to be perpendicular to the wavevector  $\vec{k}$ .

## 33 COMPTON AND RAYLEIGH SCATTERING

34

35 In order to calculate the light scattered by a system we use time dependent perturbation theory. The Hamiltonian  
36 is split into two parts. The Hamilton operator  $H_0$  contains all interactions of the system without external light  
37 field. The operator  $H_1$  contains the change to the Hamiltonian due to the interaction with the external light field.  
38 To a good approximation (i.e. neglecting the interaction of the light with the atomic nuclei and neglecting the  
39 magnetic moment of the light) we find for the sum over all electrons:

$$40 \quad H_1 = \sum_n \frac{1}{2m} (\vec{p}_n - e\vec{A}(\vec{r}_n))^2 - \frac{1}{2m} \vec{p}_n^2$$
$$41 \quad = \sum_n \frac{e^2 \vec{A}(\vec{r}_n)^2}{2m} - \frac{e\vec{A}(\vec{r}_n) \cdot \vec{p}_n}{m}$$

42 The operator  $\vec{A}$  describes either the absorption or the emission of a photon. For scattering one needs a successive  
43 absorption and emission. In a time dependent perturbation expansion in operator  $H_1$  scattering of light only  
44 happens if the operator  $\vec{A}$  enters at least twice in the series expansion. This happens in first order perturbation  
45 theory for the operator  $\vec{A}^2$  or in second order perturbation theory for the operator  $\vec{p} \cdot \vec{A} + \vec{A} \cdot \vec{p}$ . Scattering due  
46 to the  $\vec{A}^2$  is known as Compton scattering [Click or tap here to enter text.](#) where the electric field is described as  
47 particles and one can have a picture of billiard balls scattering of each other taking into account energy and  
48 momentum conservation laws. Scattering due to the operator  $\vec{p} \cdot \vec{A} + \vec{A} \cdot \vec{p}$  is related to Rayleigh scattering  
49 where the electromagnetic field induces an oscillating electric polarization of the system, which consequently  
50 leads to the emission of radiation.

51

## 52 INELASTIC X-RAY SCATTERING

53 Inelastic light scattering due to the operator  $\vec{A}^2$  is also known under the name of X-ray Raman Scattering (XRS)  
54 or non-resonant Inelastic X-ray Scattering (nIXS). Close to the atomic resonances in a material, i.e. at energies  
55 where a core electron can be excited to the unoccupied states just above the chemical potential, the resonant  
56 contribution dominates in intensity over the non-resonant contribution. Further away from the resonance the  
57  $\vec{A}^2$  scattering becomes the dominant channel for x-ray scattering. At small scattering angle, XRS can be described  
58 in the dipole approximation and its spectral shape is equivalent to X-ray absorption spectroscopy. At larger  
59 momentum transfer the dipole limit cannot be used and one can observe higher-order multipole transitions<sup>275-</sup>  
60 <sup>278279</sup>. This review deals with resonant IXS (RIXS). At resonance the scattering process is completely dominated  
61 by the operator  $\vec{p} \cdot \vec{A} + \vec{A} \cdot \vec{p}$ . and for the rest of this review we will neglect the  $A^2$  interaction term.

62

63

64

66 The RIXS cross section is given by a second order response theory, which can be derived from second order  
 67 perturbation theory expanding the work of Kubo [Click or tap here to enter text.](#) to second order. The double  
 68 differential cross section  $\partial^2\sigma/\partial\Omega\partial\omega$  describes the scattering of a plane wave of light with wavevector  $\vec{k}_i$  energy  
 69  $\hbar\omega$  and polarization  $\vec{\epsilon}_i$ .

$$70 \quad \frac{\partial^2\sigma}{\partial\Omega\partial\omega} \propto -\text{Im} \left( \left\langle i \left| R_{\vec{k}_o, \vec{\epsilon}_o}^{\vec{k}_i, \vec{\epsilon}_i}(\omega_i)^\dagger G(\omega) R_{\vec{k}_o, \vec{\epsilon}_o}^{\vec{k}_i, \vec{\epsilon}_i}(\omega_i) \right| i \right\rangle \right)$$

71 The propagator  $G(\omega)$  is defined as:

$$72 \quad G(\omega) = \frac{1}{\hbar\omega + E_i + i\frac{\Gamma}{2} - H} - \frac{1}{\hbar\omega - E_i + i\frac{\Gamma}{2} + H}$$

73 The state  $|i\rangle$  relates to the initial state or the ground-state of operator  $H$  with eigenenergy  $E_i$ . The operator  $H$  is  
 74 the Hamiltonian of the full system without the applied electromagnetic field. It describes both the valence as  
 75 well as the core electrons.  $\Gamma$  is the linewidth or self-energy operator of the excited state. The lifetime is state  
 76 dependent and as such  $\Gamma$  is an operator. For practical calculations on finite Hilbert spaces  $\Gamma$  has a finite value  
 77 due to Auger-Meitner and Fluorescence decay of the excited state.

78 The RIXS transition operator  $R_{\vec{k}_o, \vec{\epsilon}_o}^{\vec{k}_i, \vec{\epsilon}_i}(\omega_i)$  describes the absorption of a photon with energy  $\omega_i$ , the propagation of  
 79 the photo-excited system and the subsequent emission of a photon with energy  $\omega_o$ . It is defined as a function of  
 80 the transition operators  $T$  describe the absorption (emission) of a photon, and  $\vec{r}_n$  is the position vector of electron  
 81  $n$ :

$$82 \quad R_{\vec{k}_o, \vec{\epsilon}_o}^{\vec{k}_i, \vec{\epsilon}_i}(\omega_i) = T_{\vec{k}_o, \vec{\epsilon}_o}^\dagger G(\omega_i) T_{\vec{k}_i, \vec{\epsilon}_i}, \text{ with } T_{\vec{k}, \vec{\epsilon}} \approx \frac{im\omega}{\hbar} \sum_n e^{i\vec{k}\cdot\vec{r}_n} b_{\vec{k}, \vec{\epsilon}} \vec{\epsilon} \cdot \vec{r}_n$$

83 The propagator can be expanded on the eigen-basis of the Hamiltonian  $H$

$$84 \quad \sum_f \left| \left\langle f \left| T_{\vec{k}_o, \vec{\epsilon}_o}^\dagger \frac{1}{\omega_i + E_i + i\Gamma/2 - H} T_{\vec{k}_i, \vec{\epsilon}_i} \right| i \right\rangle \right|^2 = \sum_f \left| \sum_j \frac{\langle f | T_{\vec{k}_o, \vec{\epsilon}_o}^\dagger | j \rangle \langle j | T_{\vec{k}_i, \vec{\epsilon}_i} | i \rangle}{\omega_i + E_i + i\Gamma_j/2 - E_j} \right|^2.$$

85 By doing so one retrieves, in the limit where  $\Gamma_f$  goes to zero, the Kramers Heisenberg equation

$$86 \quad \frac{\partial^2\sigma}{\partial\Omega\partial\omega} \propto \sum_f \left| \sum_j \frac{\langle f | T_{\vec{k}_o, \vec{\epsilon}_o}^\dagger | j \rangle \langle j | T_{\vec{k}_i, \vec{\epsilon}_i} | i \rangle}{\omega_i + E_i + i\frac{\Gamma_j}{2} - E_j} \right|^2 \delta(E_i + \omega_i - E_f - \omega_o)$$

87

88

89

90

91 RIXS AS CONVOLUTION OF X-RAY ABSORPTION AND X-RAY EMISSION

92 RIXS can be viewed as the radiative x-ray emission intensities that are measured resonantly at an x-ray absorption  
 93 edge. If the interference effects are neglected, the intensity of the RIXS peak is the multiplication of the intensity  
 94 of the XAS excitation times the intensity of the XES decay.

95 (eq. 4) 
$$\sum_f \left| \sum_j \frac{\langle f | T_{\vec{k}_o, \vec{\epsilon}_o}^\dagger | j \rangle \langle j | T_{\vec{k}_i, \vec{\epsilon}_i} | i \rangle}{\omega_i + E_i + i\Gamma/2 - E_j} \right|^2 = \sum_f \sum_j \langle f | T_{\vec{k}_o, \vec{\epsilon}_o}^\dagger | j \rangle^2 \langle j | T_{\vec{k}_i, \vec{\epsilon}_i} | i \rangle^2$$

96 In some cases, one may also neglect the core hole effect and describe the RIXS process using only one-electron  
 97 transitions. The equation can then be further simplified to <sup>53</sup>:

98 
$$\frac{\partial^2 \sigma}{\partial \omega_o \partial \omega_i} \propto \int_{\epsilon} d\epsilon \frac{\rho(\epsilon) \rho'(\epsilon + \hbar\omega_{in} - \hbar\omega_{out})}{(\epsilon - \hbar\omega_{out})^2 + \frac{\Gamma_n^2}{4}}$$

99 with  $\rho$  and  $\rho'$  the occupied and unoccupied density of states. This equation makes the RIXS process very  
 100 accessible to theoretical modelling. However, the challenge is to assess when the approximations can be applied.

101

102

103 MOMENTUM DEPENDENCE IN RIXS

104

105 In order to discuss the momentum dependence in RIXS it is useful to factorize the momentum dependence into  
 106 a structure factor and atomic scattering length. [Click or tap here to enter text.](#) The structure factor depends on  
 107 the positions of the atoms, the atomic scattering length depends on the type of atom and its environment. For a  
 108 molecule or solid with atoms at position  $\vec{R}_j$  we can define the RIXS operator as:

109 
$$R_{\vec{q}, \omega_i}^{\vec{\epsilon}_i, \vec{\epsilon}_o} = \sum_J e^{i\vec{q} \cdot \vec{R}_J} R_{J, \omega_i}^{\vec{\epsilon}_i, \vec{\epsilon}_o}$$

110 The RIXS operator  $R_{\vec{q}, \omega_i}^{\vec{\epsilon}_i, \vec{\epsilon}_o}$  makes coherent excitations with energy  $\hbar\omega = \hbar(\omega_i - \omega_o)$  and momentum  $\hbar\vec{q} =$   
 111  $\hbar(\vec{k}_i - \vec{k}_o)$ . These are a result of excitations made at and around site  $J$  by the operator  $R$  coherently summed  
 112 over all lattice sites  $J$  at position  $\vec{R}_j$  with the phase factor  $e^{i\vec{q} \cdot \vec{R}_j}$ . Note that this operator depends on  $\vec{k}_i$  and  $\vec{k}_o$ . If  
 113 the wavelength  $2\pi/|\vec{k}|$  is large compared to the radial extend of the local core state excited, one can use the  
 114 dipole approximation and set  $e^{i\vec{k} \cdot \vec{r}} \approx 1$ , removing the momentum dependence from the local RIXS transition  
 115 operator. This is for most edges a good approximation. Note that for deep core levels the incident energy is high,  
 116 and thus the wavelength short. At the same time the radial extend of the core orbital is small such that the dipole  
 117 approximation is still good.

118

120

121 RIXS is, for many cases, comparable to Inelastic Neutron Scattering (INS). Both methods allow one to probe the  
 122 energy and momentum dependence of low lying excitations. These include phonons, magnons and crystal-field  
 123 transitions i.e. orbitons. The RIXS cross section is often larger, allowing one to probe much smaller sample  
 124 volumes. On the other hand, the maximum momentum transfer in RIXS is set by the resonant photon energy.  
 125 Often this only includes part of the Brillouin zone. As such both methods are complementary. There is one big  
 126 difference between RIXS and INS. For INS the interaction with the neutron and the (magnetic moment) of the  
 127 electrons is well understood and relatively simple. In RIXS the low energy excitations are made in a resonant  
 128 process by the operator  $R_{J,\omega_i}^{\vec{\epsilon}_l, \vec{\epsilon}_o}$ . This operator includes the interaction with the electromagnetic field (light) twice.  
 129 The interaction between electrons and photons is just like the interaction between neutrons and electrons well  
 130 understood. The operator  $R_{J,\omega_i}^{\vec{\epsilon}_l, \vec{\epsilon}_o}$  also includes the propagator  $G(\omega)$ . This propagator describes the (Fourier  
 131 transform) of the time evolution of the many-electron system after a photon is absorbed. This propagator  
 132 includes a local core hole and all many-body interactions between the electrons. As core states are localized one  
 133 can calculate this propagator relatively well. However one does need advanced multi-reference quantum  
 134 chemistry methods to do this. As a result nothing is simple about this propagator.

135 The operator  $R_{J,\omega_i}^{\vec{\epsilon}_l, \vec{\epsilon}_o}$  can excite single, double, triple, etc. spin flips at and around site  $J$ , it can make charge  
 136 excitations and measure the charge dynamical structure factor, it can excite phonons. Actually any low energy  
 137 excitation that is allowed by symmetry can be excited by RIXS. The intensity of the different excitations RIXS  
 138 couples to is strongly polarization ( $\vec{\epsilon}_l, \vec{\epsilon}_o$ ) and resonant energy  $\omega_i$  dependent. For many choices of polarization  
 139 and resonant energy, only a few low energy excitation types dominate the RIXS spectrum.

140 In order to understand which low energy excitaiton the RIXS operator  $R_{J,\omega_i}^{\vec{\epsilon}_l, \vec{\epsilon}_o}$  can excite one can expand the  
 141 operator on a complete orthonormal set of simpler operators. The expansion coefficients then will carry the  
 142 resonant energy and polarization dependence. For a doped Hubbard model, relevant for the cuprates this yields  
 143 a set of spin and charge operators acting at and around site  $J$ , with specific energy and polarization dependence<sup>50</sup>.  
 144 For magentic excitations one can expand the RIXS operator onto spin operators. In spherical symmetry expanded  
 145 to local spin excitations on site  $J$  only this yields<sup>21</sup>.

$$146 \quad R_{J,\omega_i}^{\vec{\epsilon}_l, \vec{\epsilon}_o} = \sigma^{(0)}(\omega_i) \vec{\epsilon}_l \cdot \vec{\epsilon}_o^* + \frac{1}{s} \sigma^{(1)}(\omega_i) \vec{\epsilon}_o^* \times \vec{\epsilon}_l \cdot \vec{S}_J$$

$$147 \quad + \frac{1}{s(2s-1)} \sigma^{(2)}(\omega_i) \left( (\vec{\epsilon}_l \cdot \vec{S}_J) (\vec{\epsilon}_o^* \cdot \vec{S}_J) + (\vec{\epsilon}_o^* \cdot \vec{S}_J) (\vec{\epsilon}_l \cdot \vec{S}_J) - \frac{2}{3} (\vec{\epsilon}_l \cdot \vec{\epsilon}_o^*) \vec{S}_J^2 \right),$$

148 With  $s$  the length of the local spin operator and  $\sigma^{(0)}(\omega_i)$  the local isotropic x-ray absorbtion spectrum,  $\sigma^{(1)}(\omega_i)$   
 149 the local magnetic circular dichroic x-ray absorbtion spectrum one would measure if the spin was fully aligned  
 150 and,  $\sigma^{(2)}(\omega_i)$  the local magnetic linear dichroic x-ray absorbtion spectrum one would measure if the spin was  
 151 fully aligned. For atoms at lower crystal point-group symmetries the operators branch according to the point-  
 152 group branching rules [Click or tap here to enter text.](#). The expansion of the RIXS operators into polynomials of the  
 153 spin operators (Stevens Operators) truncates in spherical symmetry at order 2. For lower symmetries, which  
 154 crystals always possess, the series does not truncate as angular momentum can be transferred to the crystal

155 lattice<sup>21</sup>. For resonant energies below the main absorption line the local transitions normally dominate the  
156 spectrum. For resonant energies that are at or above the first resonance, one can expect that additional spin  
157 excitations on the neighboring sites around lattice site J become important.

## 158 DIRECT AND INDIRECT RIXS

159

160 In the results section we classified different RIXS spectra into core and valence RIXS. This classification depends  
161 on the question if the final state of the RIXS process has a core hole or not. For valence RIXS one needs to consider  
162 polarization, resonant energy, and momentum transfer to fully understand the spectra. For core RIXS one can  
163 neglect the momentum transfer as core levels do not disperse. A different classification of the RIXS process can  
164 be made based on the interactions involved within the RIXS process. One can classify both core and valence RIXS  
165 into direct or indirect RIXS.

166 For direct RIXS a core electron can be excited into one of the single electron states above the chemical potential.  
167 After the excitation another electron can decay from one of the occupied single electron states, either a shallow  
168 core electron or a valence electron, into the previously formed core hole. For indirect RIXS one also starts by  
169 exciting a core electron into one of the single electron states above the chemical potential. One now assumes  
170 that the electron that decays back into the core is the same electron as the electron that was excited. This  
171 seemingly elastic process can generate excitations. The core hole and additional electron interact with the other  
172 electrons in the system. This can result in the scattering of other electrons from occupied to unoccupied orbitals,  
173 thereby generating low lying excitations.

174 One has to be careful when explaining direct and indirect RIXS in terms of decaying with the same or a different  
175 electron. Electrons are indistinguishable particles and formally one cannot distinguish if the same or a different  
176 electron decayed compared to the one excited. A more accurate definition of direct and indirect RIXS can be  
177 made by the use of a Dyson perturbation expansion

178 We can write the full Hamiltonian  $H$  of the system as a sum of  $H_0$  and  $H_1$

179

$$H = H_0 + H_1,$$

180 with  $H_0$  the (mean-field) Hamiltonian describing the ground-state without core hole and  $H_1$  all terms neglected  
181 in  $H_0$  to obtain the full Hamiltonian. For the case where  $H_0$  is a full interacting Hamiltonian describing the valence  
182 electrons including the many-body Coulomb corrections the Hamiltonian  $H_1$  contains the direct and exchange  
183 interaction between the valence electrons and the core hole. For the case where  $H_0$  is a mean-field Hamiltonian,  
184 as assumed in many discussions on direct and indirect RIXS, the operator  $H_1$  also contains the two electron  
185 Coulomb interactions between the valence electrons. Once an appropriate choice for  $H_0$  and  $H_1$  is made we can  
186 rewrite the RIXS operator  $R_{k_o, \vec{\epsilon}_o}^{\vec{k}_i, \vec{\epsilon}_i}(\omega_i)$  in terms of a direct and indirect part. The RIXS operator  $R_{k_o, \vec{\epsilon}_o}^{\vec{k}_i, \vec{\epsilon}_i}(\omega_i)$  is given  
187 by the product of an operator that absorbs an x-ray and creates a core hole ( $T_{k_i, \vec{\epsilon}_i}^-$ ), an operator that describes  
188 the propagation of the many electron core hole state in the system ( $G(\omega_i)$ ), and an operator that emits an x-ray  
189 and fills the core hole ( $T_{k_o, \vec{\epsilon}_o}^+$ ),

190 
$$R_{\vec{k}_0, \vec{\epsilon}_0}^{\vec{k}_i, \vec{\epsilon}_i}(\omega_i) = T_{\vec{k}_0, \vec{\epsilon}_0}^\dagger G(\omega_i) T_{\vec{k}_i, \vec{\epsilon}_i}.$$

191 Using the definition of the Green's function we find for the Dyson equation

192 
$$\begin{aligned} G^{-1}(\omega_i) &= \hbar\omega + E_i + i\frac{\Gamma}{2} - H \\ &= \hbar\omega + E_i + i\frac{\Gamma}{2} - H_0 - H_1 \\ &= G_0^{-1}(\omega_i) - H_1, \end{aligned}$$

193 and thus, by multiplying from the left with  $G_0(\omega_i)$  and from the right with  $G(\omega_i)$

194 
$$G(\omega_i) = G_0(\omega_i) + G_0(\omega_i)H_1 G(\omega_i).$$

195 We now can write for the direct RIXS operator

196 
$$Rd_{\vec{k}_0, \vec{\epsilon}_0}^{\vec{k}_i, \vec{\epsilon}_i}(\omega_i) = T_{\vec{k}_0, \vec{\epsilon}_0}^\dagger G_0(\omega_i) T_{\vec{k}_i, \vec{\epsilon}_i},$$

197 and for the indirect RIXS operator

198 
$$Ri_{\vec{k}_0, \vec{\epsilon}_0}^{\vec{k}_i, \vec{\epsilon}_i}(\omega_i) = T_{\vec{k}_0, \vec{\epsilon}_0}^\dagger G_0(\omega_i)H_1 G(\omega_i) T_{\vec{k}_i, \vec{\epsilon}_i}.$$

199 The distinction between direct and indirect RIXS can be exemplified by two cases.

200 For direct RIXS an effective operator can be derived that only depends on the polarization of the light. If one  
 201 assumes that  $H_0$  only includes the core level onsite energy and spin-orbit coupling interaction one obtains the  
 202 fast collision approximation. This name originates from the observation that if the interaction of the photon with  
 203 the system occurs very fast, no additional indirect excitations are made. The fast collision approximation is a  
 204 reasonable approximation if the intermediate state Coulomb interaction and crystal field is small compared to  
 205 core hole lifetime. One can use this approximation for excitations within the  $t_{2g}$  orbitals excited at the  $L_{23}$  edge  
 206 in Iridates for example. In this limit one can derive an analytical expression for the RIXS scattering cross section  
 207 and its polarization dependence, thereby relating RIXS to inelastic neutron scattering. The effective operator  
 208 formalism described in the previous section includes these direct RIXS processes, but also includes the indirect  
 209 RIXS processes and as such has a dependence of the RIXS cross section on the resonant light energy.

210 Indirect RIXS becomes important, for example, at transition metal K edges. At these edges one can excite a core  
 211 s electron into the p sub-shell of a transition metal ion. Subsequently this p electron decays back to the core  
 212 orbital. In the intermediate state the p electron can interact with the d electrons via the Coulomb interaction.  
 213 One could for example excite with x polarized light an s core electron to the  $p_x$  orbital. Coulomb interaction then  
 214 can scatter the  $p_x$  electron to a  $p_y$  electron whilst simultaneously scatter a  $d_{yz}$  electron to an  $d_{xz}$  orbital. The  $p_y$   
 215 electron can subsequently decay back to the s core state under the emission of a photon with y polarization.

216 In general the RIXS intensity is given by a sum of the direct and indirect part as well as interferences between the  
 217 two channels. One should be carefull when making a series expansion of  $H$  in  $H_1$  around  $H_0$ . There is no



218 guarantee that such a series converges. We note that in this definition of direct and indirect RIXS, each RIXS  
219 feature in the multiplet model (for example  $3d^7 > 2p^5 3d^8 > 3d^7$ ) will be a combination of direct RIXS and indirect  
220 RIXS. If one does not use a single-electron model for  $H_0$ , but instead uses that  $H_0$  is the crystal field multiplet  
221 model then all multiplet states will be direct RIXS and charge transfer states could be called indirect RIXS. But if  
222 the Anderson impurity model is defined as  $H_0$  then everything becomes again direct RIXS. In other words, the  
223 distinction between direct and indirect RIXS depends on the model that is chosen for  $H_0$  and  $H_1$ .

224

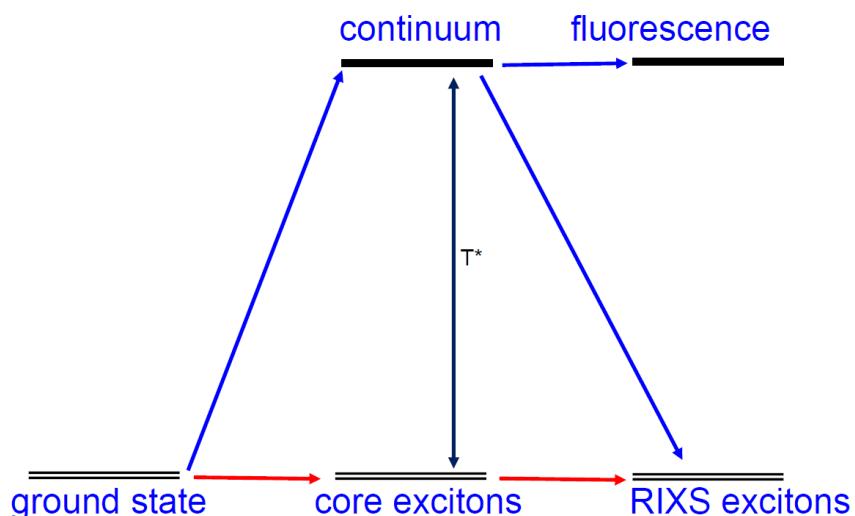

225

226 **Figure S1: Direct and indirect RIXS channels due to interference of excitons and continuum excitations.**

227 For gas phase molecules one can make a distinction between excitons ( $H_0$ ) and ionization ( $H_1$ ) and for the K edge  
228 of transition metal systems one can make a distinction between core excitons ( $H_0$ ) and continuum excitations  
229 ( $H_1$ ). Figure S1 gives an example of direct and indirect RIXS for such system. The RIXS experiment that follows the  
230 path from the ground state to core excitons and then decay to RIXS excitons would be direct RIXS. Indirect RIXS  
231 would be a continuum excitation followed by decay to the RIXS excitons. The reason that indirect RIXS is possible  
232 is due to the coupling of the core excitons ( $H_0$ ) and the continuum ( $H_1$ ).

233
